# Supplementary material for: KRT8 and KRT19, associated with EMT, are hypomethylated and overexpressed in lung adenocarcinoma and link to unfavorable prognosis
Source: PubMed Central journal article supplement (PMC7335829; doi:10.1042/bsr20193468), 2020-07-03
Supplement: BSR-2019-3468_supp.pdf [file BSR-2019-3468_supp.pdf]

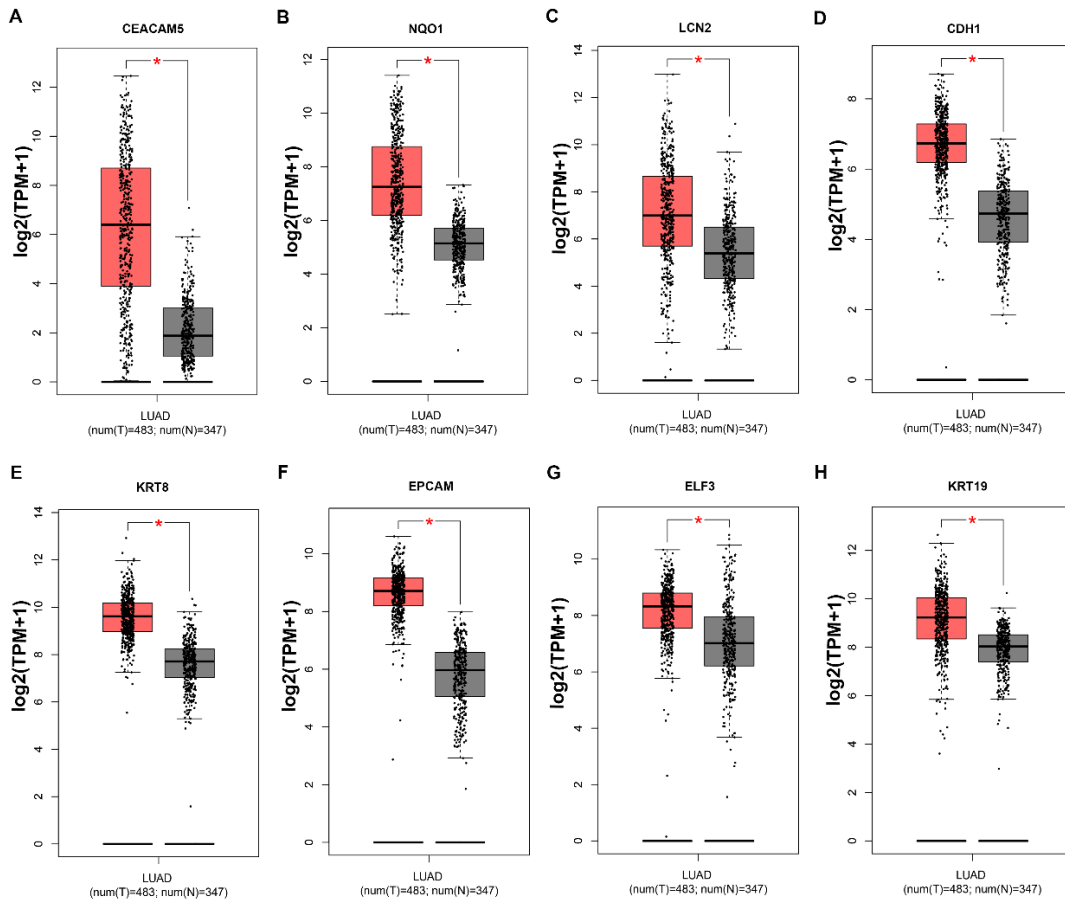

Figure S1. The expression of potential upregulated genes in LUAD determined by GEPIA database. (A) CEACAM5 expression; (B) NQO1 expression; (C) LCN2 expression; (D) CDH1 expression; (E) KRT8 expression; (F) EPCAM expression; (G) ELF3 expression; (H) KRT19 expression. Note: red column represents tumor group and gray column represents normal group. \* $P < 0.05$ .

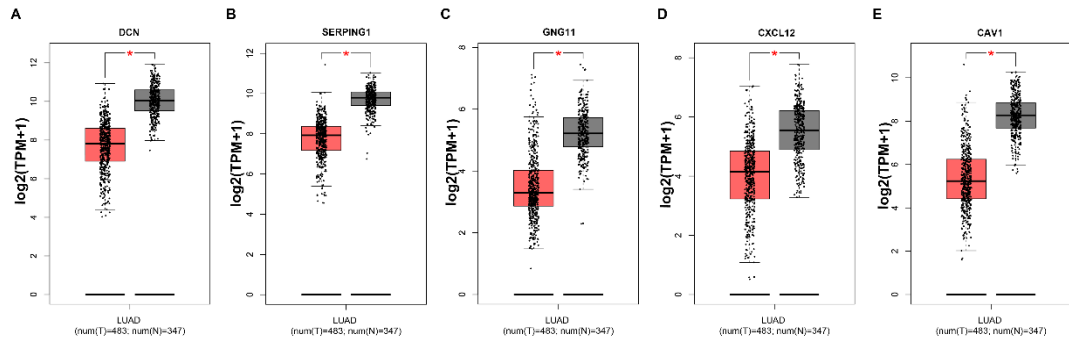

Figure S2. The expression of potential downregulated genes in LUAD determined by GEPIA database. (A) DCN expression; (B) SERPING1 expression; (C) GNG11 expression; (D) CXCL12 expression; (E) CAV1 expression.

Note: red column represents tumor group and gray column represents normal group. \*P<0.05.

---

Table S1. Numbers of differentially expressed genes between LUAD tissues and normal lung tissues from three datasets, namely GSE7670, GSE10072 and GSE32863.

| GEO accession | Upregulated gene count | Downregulated gene count | Total |
|---------------|------------------------|--------------------------|-------|
| GSE7670       | 913                    | 1135                     | 2048  |
| GSE10072      | 296                    | 559                      | 855   |
| GSE32863      | 550                    | 878                      | 1428  |

---

Table S2. Upregulated genes commonly appeared in all three datasets (GSE7670, GSE10072 and GSE32863).

---

Upregulated genes

---

COL11A1  
CDH3  
SPINK1  
SPP1  
COL10A1  
TMPRSS4  
TOP2A  
NEK2  
CRABP2  
COL1A1  
COMP  
NMU  
EEF1A2  
SFN  
MMP11  
BIRC5  
CEACAM5  
CST1  
GOLM1  
CDC20  
GCNT3  
MMP12  
KRT15  
LGSN  
ASPM  
MELK  
CXCL14  
CLDN3  
CD24  
CENPF  
MCM4  
COL1A2  
PCP4  
COL3A1  
PHLDA2  
PLPP2  
TPX2

---

---

HMGB3  
TFAP2A  
SULF1  
SOX4  
KIAA0101  
THBS2  
AGR2  
IGF2BP3  
GDF15  
MMP9  
AURKA  
MDK  
NQO1  
LCN2  
NUSAP1  
MUC16  
KDEL2  
CCNB2  
UBE2C  
DNAJC12  
GGCT  
BZW2  
SLC2A1  
TYMS  
ST14  
SCG5  
NME1  
IGFBP3  
COL5A2  
TCN1  
PAICS  
DSP  
RGS17  
HIST1H2BD  
KDEL3  
CEACAM1  
SLC7A5  
F2RL1  
SRPX2  
TNFRSF21

---

---

STK39  
PRC1  
PPP1R14B  
LAPTM4B  
FHL2  
PLOD2  
NET1  
HMGA1  
SHMT2  
SORD  
MARCKSL1  
C1orf106  
FEN1  
TIMP1  
CDH1  
PDIA4  
MUC4  
KRT8  
TRIP13  
AHNAK2  
EPCAM  
GAPDH  
GFPT1  
ECT2  
ATP2A2  
ELF3  
CFB  
KRT19

---

---

Table S3. Downregulated genes commonly appeared in all three datasets (GSE7670, GSE10072 and GSE32863).

---

Downregulated genes

---

FLRT3

FBP1

LAMA4

PODXL

CRTAC1

SEMA5A

SPTBN1

MAOA

TPSAB1

TIMP3

RGS5

EPB41L2

EGR1

GADD45B

FBLN1

DUOX1

HPGD

TRPV2

LMCD1

CD93

HYAL2

SESN1

AQP1

STOM

ACP5

C1QB

SLC39A8

RCAN1

C5AR1

IL7R

GRK5

MYH11

PHACTR2

DMBT1

SPOCK2

WFS1

---

---

ENG  
CTNNAL1  
PLPP3  
TYROBP  
FERMT2  
RAB11FIP1  
GATA2  
GAS6  
EPAS1  
WASF3  
SFTPB  
EML1  
HEY1  
TMEM47  
FABP5  
PID1  
FOLR1  
SLPI  
PAPSS2  
SMAD6  
DCN  
TBX2  
SECISBP2L  
CPA3  
ARRB1  
CAT  
ZFP36  
RASL12  
SASH1  
DUSP1  
LDLR  
ALOX5  
CLIC5  
C4BPA  
KANK2  
ALOX5AP  
MSR1  
GPM6B  
PTRF  
A2M

---



---

DKK3  
PROS1  
EMP1  
GPRC5A  
NDNF  
HEG1  
DNASE1L3  
SLCO2A1  
EFEMP1  
OLFML1  
PPP1R15A  
CBX7  
GMFG  
TGFBR2  
ADGRE5  
PLSCR4  
OLR1  
ADAMTS8  
SLIT2  
SYNM  
ATF3  
PLLP  
ZEB2  
FOS  
NEDD9  
APOLD1  
TACC1  
ETS2  
TMEM204  
FAM189A2  
SERPING1  
KLF6  
STARD13  
MND4  
GHR  
ADRB2  
ICAM2  
DPT  
FEZ1  
LMO2

---

---

JAM2  
FXVD6  
S100A4  
COX7A1  
ID1  
HBEGF  
FGR  
RRAS  
PTGDS  
ARHGAP44  
HOXA5  
CAMK2N1  
COL13A1  
KLF9  
LMO7  
VSIG4  
CXCL2  
GNG11  
ANXA3  
DPYSL2  
METTL7A  
HSPB8  
CTGF  
ITM2A  
NR4A2  
PMP22  
CXCL12  
EDN1  
CNN1  
PDK4  
AQP4  
MYL9  
SPARCL1  
CDO1  
LHFP  
CA2  
MYH10  
SEMA6A  
DACH1  
C1orf115

---

---

SDPR  
CALCRL  
SRPX  
PCOLCE2  
HSD17B6  
ABCA3  
KLF2  
LIMS2  
SOCS2  
LIMCH1  
P3H2  
PECAM1  
PLA2G1B  
ID3  
LRRN3  
CRYAB  
RASIP1  
CD52  
GPX3  
IL6  
PTGER4  
ZBED2  
ADGRL2  
PTPRB  
CX3CR1  
TSPAN7  
LAMP3  
CLIC3  
FBLN5  
VWF  
FMO2  
FOXF1  
ACADL  
CACNA2D2  
S1PR1  
GPC3  
CAV2  
PGC  
AHNAK  
ADARB1

---

---

TGFBR3  
CPB2  
LPL  
DES  
ZBTB16  
CLDN5  
LRRC32  
ANGPT1  
PDZD2  
GDF10  
BCHE  
TBX3  
LYVE1  
RAMP3  
ALDH1A1  
KLF4  
RECK  
FHL1  
EDNRB  
ADAMTS1  
LTBP4  
C7  
SFTPC  
CLDN18  
VIPR1  
NEDD4L  
CDH5  
TEK  
WFDC1  
TPPP3  
MME  
FGFR4  
UPK3B  
SVEP1  
AOC3  
ACKR1  
HYAL1  
CFD  
CD36  
FXVD1

---

---

ANOS1  
FAM107A  
RGCC  
ADH1B  
IL33  
LDB2  
EMCN  
DPEP2  
HBB  
CAV1  
SFTPD  
KANK3  
SLC6A4  
MARCO  
ABCA8  
SCGB1A1  
IL1RL1  
TCF21  
CYP4B1  
CA4  
MFAP4  
HIGD1B  
RAMP2  
STXBP6  
ADIRF  
MT1M  
FOSB  
FCN3  
TMEM100  
FABP4  
WIF1  
SOSTDC1  
AGER  
TNNC1

---

Table S4. Upregulated genes enriched in mesenchymal-to-epithelial transition (MET) and downregulated genes enriched in epithelial-to-mesenchymal transition (EMT).

| Upregulated genes in MET | Downregulated genes in EMT |
|--------------------------|----------------------------|
| CDH3                     | FBLN1                      |
| TMPRSS4                  | FERMT2                     |
| SFN                      | DCN                        |
| CEACAM5                  | GPM6B                      |
| KRT15                    | PTRF                       |
| CLDN3                    | HEG1                       |
| CD24                     | EFEMP1                     |
| PHLDA2                   | SLIT2                      |
| AGR2                     | SYNM                       |
| GDF15                    | ZEB2                       |
| NQO1                     | SERPING1                   |
| LCN2                     | DPT                        |
| ST14                     | JAM2                       |
| DSP                      | FXVD6                      |
| CEACAM1                  | PTGDS                      |
| SORD                     | VSIG4                      |
| C1orf106                 | GNG11                      |
| CDH1                     | ITM2A                      |
| KRT8                     | PMP22                      |
| EPCAM                    | CXCL12                     |
| ELF3                     | MYL9                       |
| KRT19                    | SPARCL1                    |
|                          | LHFP                       |
|                          | MYH10                      |
|                          | SRPX                       |
|                          | CRYAB                      |
|                          | RECK                       |
|                          | FHL1                       |
|                          | CAV1                       |
|                          | MFAP4                      |
